# Supplementary material for: Gαi3 signaling is associated with sexual dimorphic expression of the clock-controlled output gene Dbp in murine liver
Source: PubMed Central journal article supplement (PMC6084400; doi:10.18632/oncotarget.25727), 2018-07-13
Supplement: oncotarget-09-30213-s001.pdf [file oncotarget-09-30213-s001.pdf]

## $G\alpha_{i3}$ signaling is associated with sexual dimorphic expression of the Clock-controlled output gene *Dbp* in murine liver

### SUPPLEMENTARY MATERIALS

#### SUPPLEMENTARY EXPERIMENTAL PROCEDURES

##### Isolation of tail fibroblasts

The isolation and culture of murine tail fibroblasts was performed as described [2]. Tails (1–2 cm lengths) were washed in 70% ethanol and incubated on ice for 1 h in complete Dulbecco's modified Eagle medium supplemented with 10% fetal bovine serum and penicillin-streptomycin. Following alternate washes in ice cold PBS containing penicillin-streptomycin and 70% ethanol, tails were minced into small pieces and digested overnight with collagenase type II (400 units/ml; 1600 units per tail) in a humidified incubator (7% CO<sub>2</sub>). Cells were isolated by repeated pipetting, filtered through a 70  $\mu$ m nylon cell strainer, centrifuged at 1000 rpm for 5 min, and finally resuspended in complete medium. Cells were grown on 60 mm dishes to a confluency of 80–90% prior to passaging on 20 cm culture plates (1  $\times$  10<sup>6</sup> cells/plate). Tail fibroblasts between passages 1 and 5 were analyzed.

##### Production of lentiviral vectors

Lentiviral vectors were produced by polyethyleneimine (PEI, Sigma-Aldrich, Germany) based transfection of HEK293T cells with 6  $\mu$ g of an HIV1 packaging plasmid (pCMV $\Delta$ R8.2), 6  $\mu$ g of the envelope vector (pMD2.G), and 6  $\mu$ g of the vector plasmid with the Bmal1-Luciferase reporter gene [1, 3]. Viral supernatants were harvested 48 hours later, passed through a 0.45- $\mu$ m filter (Sartorius AG, Germany), and then used to transduce primary tail fibroblasts. After 24 h the viral supernatant was replaced with fresh medium.

##### Determination of period length in primary tail fibroblasts by Bmal-luciferase real-time bioluminescence monitoring

Lentivirally transduced primary tail fibroblasts stably expressing a Bmal1-Luciferase reporter gene

were grown in Dulbecco's modified Eagle's medium (DMEM) supplemented with 10% fetal calf serum (FCS) and 1% penicillin/streptomycin (Life Technologies). Confluent cells were trypsinized and 5  $\times$  10<sup>5</sup> cells were seeded into 35 mm culture dishes one day before real-time bioluminescence monitoring was initiated. Cellular clocks were synchronized with 100 nM dexamethasone for 30 min. After synchronization the medium was replaced with phenol red-free DMEM (Life Technologies) supplemented with 10% FCS and 100  $\mu$ M luciferin. Real-time bioluminescence was monitored in a light-tight incubator using photomultiplier tube detector assemblies (LumiCycle, Actimetrics). Phase, amplitude, and period length of circadian oscillations were determined with the LumiCycle Analysis software.

##### Quantitative real-time PCR analysis of DBP and CYP3A4 expression in human HepG2 hepatoma cells

HepG2 cells were grown in Dulbecco's modified Eagle's medium (DMEM) supplemented with 10% fetal calf serum (FCS) and 1% penicillin/streptomycin (Life Technologies). The adenylyl cyclase activator Forskolin and the selective and *in-vivo* well tolerated CREB inhibitor 666-15 [4] were obtained from Sigma-Aldrich and Tocris, respectively. Total RNA was extracted using the Universal mRNA/miRNA Purification Kit (roboklon). One  $\mu$ g of liver RNA was reverse-transcribed using oligo(dT)<sub>15</sub> primers and the ImProm™ II Reverse Transcription System (Promega) according to the manufacturer's specifications. Relative quantification of mRNA was carried out using SYBR® Green-based real-time RT-PCR (7500 Real-Time PCR System; Applied Biosystems) using the QuantiTect® primer assay for DBP (Hs\_DBP\_1\_SG) and CYP3A4 (Hs\_CYP3A4\_1\_SG) from Qiagen and the Fast SB qPCR Master Mix plus ROX (roboklon). For normalization  $\beta$ -Actin mRNA levels were determined.

## REFERENCES

1. Nagoshi E, Saini C, Bauer C, Laroche T, Naef F, Schibler U. Circadian gene expression in individual fibroblasts: cell-autonomous and self-sustained oscillators pass time to daughter cells. *Cell*. 2004; 119:693–705.
2. Salmon AB, Murakami S, Bartke A, Kopchick J, Yasumura K, Miller RA. Fibroblast cell lines from young adult mice of long-lived mutant strains are resistant to multiple forms of stress. *Am J Physiol Endocrinol Metab*. 2005; 289:E23–9.
3. Schneider R, Linka RM, Reinke H. HSP90 affects the stability of BMAL1 and circadian gene expression. *Journal of Biological Rhythms*. 2014; 29:87–96.
4. Li BX, Gardner R, Xue C, Qian DZ, Xie F, Thomas G, Kazmierczak SC, Habecker BA, Xiao X. Systemic inhibition of CREB is well-tolerated *in vivo*. *Sci Rep*. 2016; 6: 34513. <https://doi.org/10.1038/srep34513>.

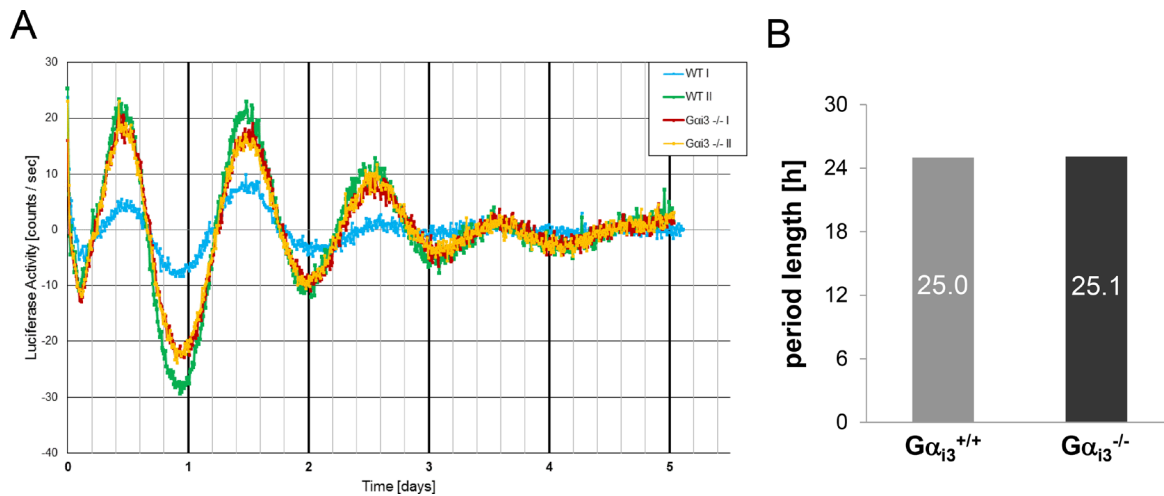

**Supplementary Figure 1: The period length of primary tail fibroblasts isolated from  $G\alpha_{13}$  deficient female mice is comparable to the period length of wild-type control fibroblasts.** Lentivirally transduced primary tail fibroblasts stably expressing a *Bmal1*-Luciferase reporter gene were subjected to real-time bioluminescence monitoring (A) as described in the supplementary experimental procedures. Fibroblasts were transduced and analyzed giving rise to a period length that was comparable between wild-type and  $G\alpha_{13}^{-/-}$  fibroblasts (mean of two independent lines analyzed per genotype) (B).

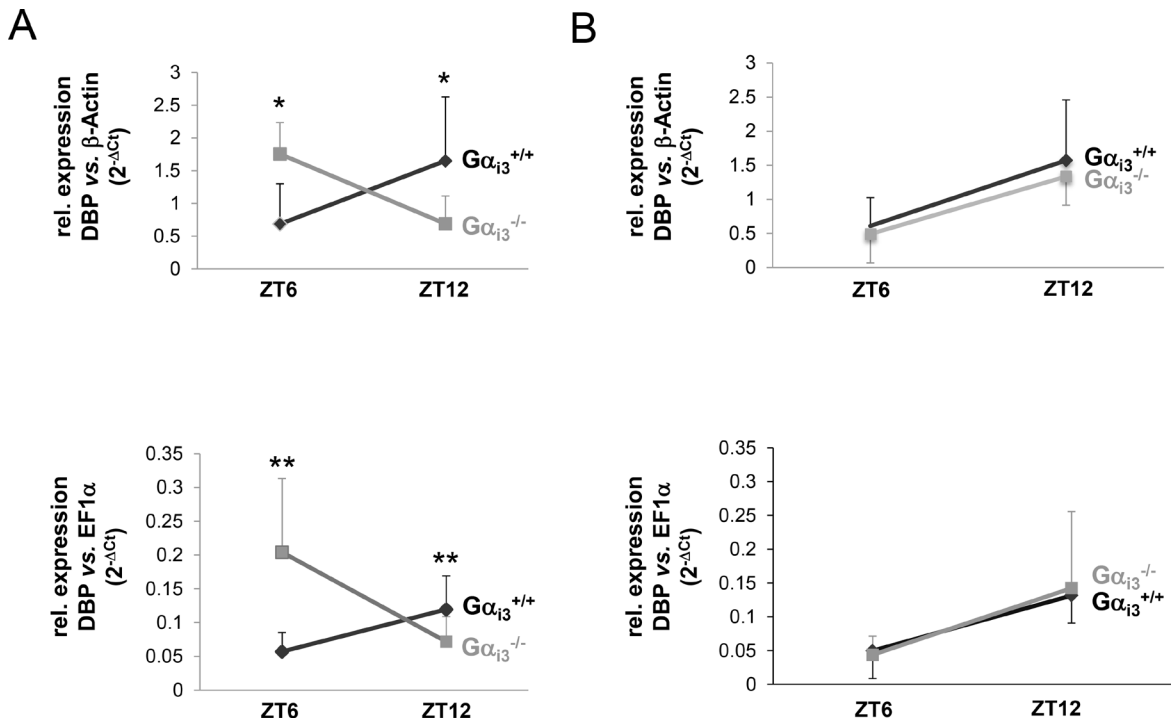

**Supplementary Figure 2: Expression analysis of DBP transcript levels in the liver of female  $G\alpha_{13}^{-/-}$  mice using different normalization controls.** (A, B) Quantitative real-time PCR analysis of rhythmic expression of DBP mRNA in the liver of female (A) and male (B)  $G\alpha_{13}$ -deficient mice as compared to wild-type control animals.  $\beta$ -Actin (upper panels) and EF1 $\alpha$  (lower panels) were used as normalization controls. Mice were sacrificed and analyzed at ZT6 and ZT 12. Results are expressed as mean  $\pm$  s.d. of six animals analyzed per genotype and time point (\* $p < 0.05$ , \*\* $p < 0.01$  as compared to wild-type control animals).

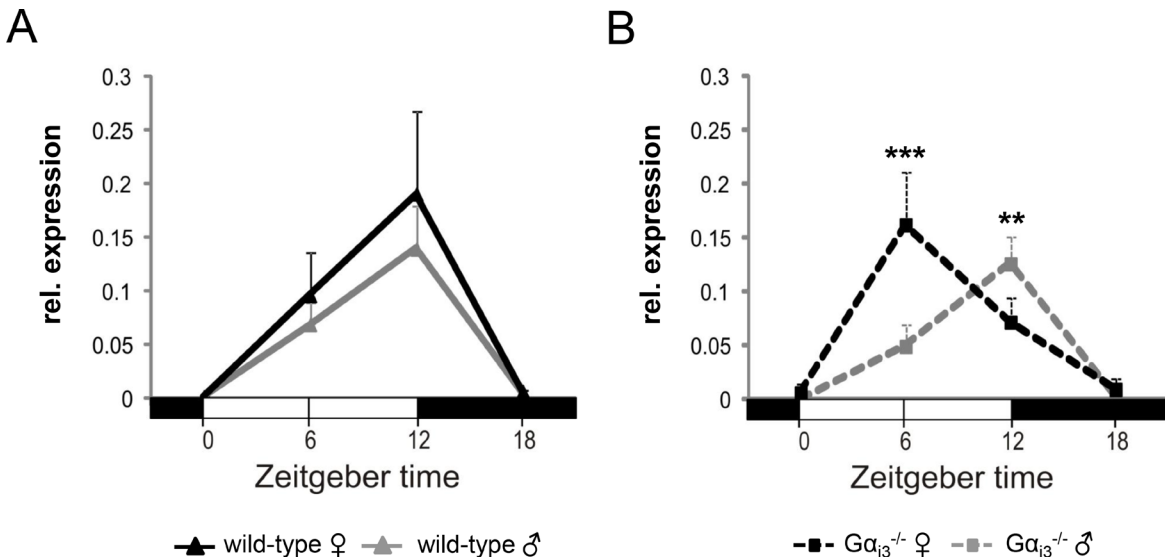

**Supplementary Figure 3: Loss of  $G\alpha_{13}$  reveals a sexual-dimorphic expression of the albumin D-box binding protein (DBP) in murine liver.** Quantitative real-time PCR analysis of circadian expression of DBP mRNA in the liver of female vs. male wild-type animals (A) and female vs. male  $G\alpha_{13}$  deficient animals (B). Mice were sacrificed and analyzed every six hours at the indicated time points (ZT 0 to ZT 18). Dbp transcript levels were normalized to the endogenous control Gapdh. Shown are  $2^{-\Delta Ct}$  values. Data are expressed as mean  $\pm$  s.d. of six animals analyzed per genotype and time-point (\*\* $p < 0.01$ , \*\*\* $p < 0.001$ ).

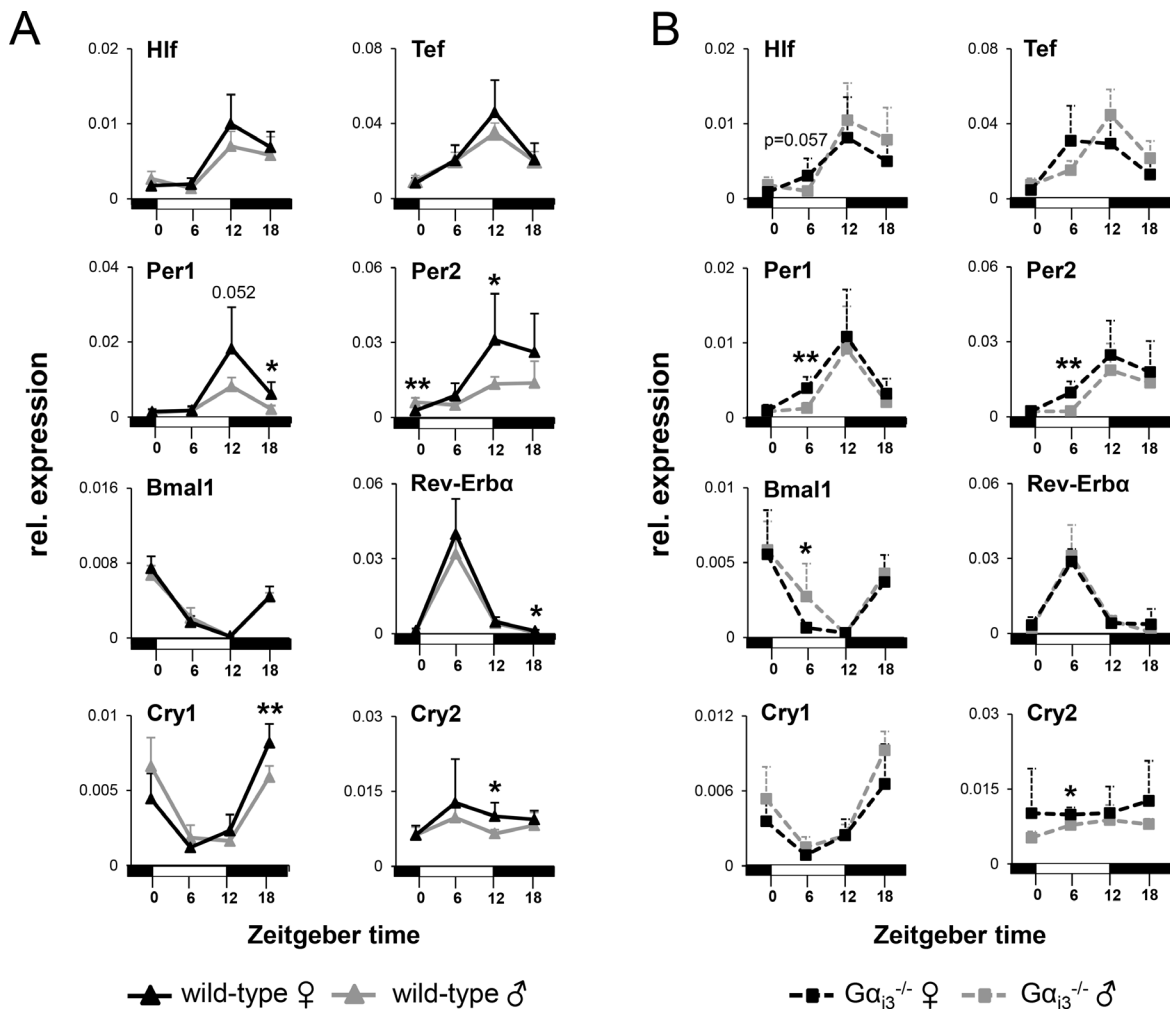

**Supplementary Figure 4: Analysis of rhythmic and sex-specific expression of core clock genes and clock-regulated genes in the liver of wild-type and  $G\alpha_{i3}^{-/-}$  mice.** Quantitative real-time PCR analysis of circadian expression of DBP mRNA in the liver of female vs. male wild-type mice (A) and female vs. male  $G\alpha_{i3}^{-/-}$  deficient animals (B). Mice were sacrificed and analyzed every six hours at the indicated time points (ZT 0 to ZT 18). Transcript levels of the indicated genes were normalized to the endogenous control Gapdh. Shown are  $2^{-\Delta Ct}$  values. Results are expressed as mean  $\pm$  s.d. of six animals analyzed per genotype and time point (\* $p < 0.05$ , \*\* $p < 0.01$  as compared to wild-type control animals).

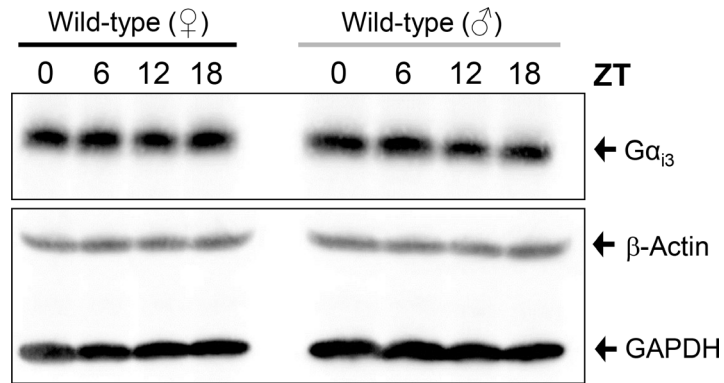

**Supplementary Figure 5: Comparable rhythmic  $G\alpha_{13}$  protein levels in the liver of male and female wild-type mice.** Immunoblot analysis of total protein lysates from the liver of wild-type male and female mice employing a  $G\alpha_{13}$  isoform-specific antibody. GAPDH and  $\beta$ -Actin were employed as normalization controls. Mice were sacrificed and analyzed every six hours at the indicated time points (ZT 0 to ZT 18).

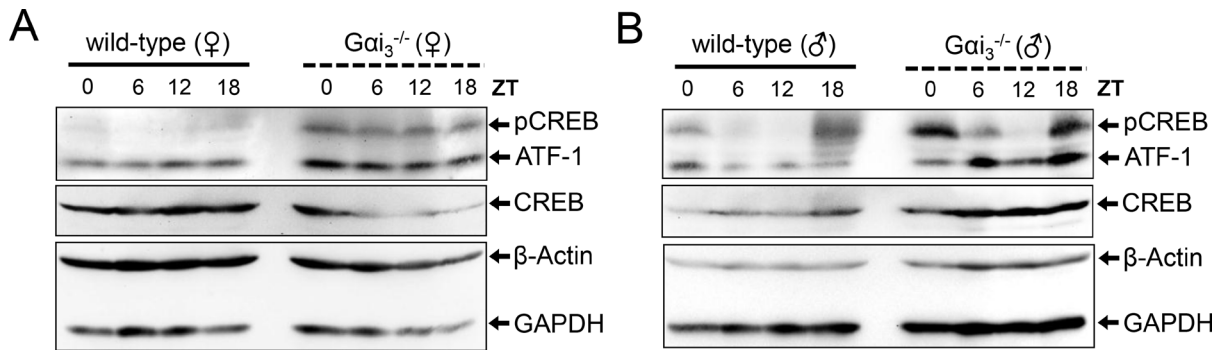

**Supplementary Figure 6:  $G\alpha_{13}^{-/-}$  female mice display increased cellular pSer133-CREB levels in the liver.** Immunoblot analysis of pSer133-CREB levels and CREB expression in total cell lysates from livers of female (A) and male (B) wild-type vs.  $G\alpha_{13}^{-/-}$  mice. GAPDH and  $\beta$ -Actin were detected as normalization controls. Mice were sacrificed and analyzed every six hours at the indicated time points (ZT 0 to ZT 18). ATF1, activating transcription factor 1.

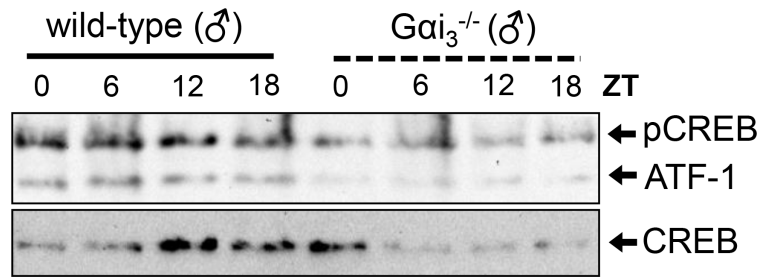

**Supplementary Figure 7: Comparable nuclear pSer133-CREB / CREB levels in the liver of  $G\alpha_{i3}^{-/-}$  and wild-type male mice.** Immunoblot analysis of pSer133-CREB and CREB protein levels in nuclear vs. cytoplasmic extracts from livers of male wild-type vs.  $G\alpha_{i3}^{-/-}$  mice. Animals were sacrificed and analyzed every six hours at the indicated time points (ZT 0 to ZT 18). ATF1, activating transcription factor 1.

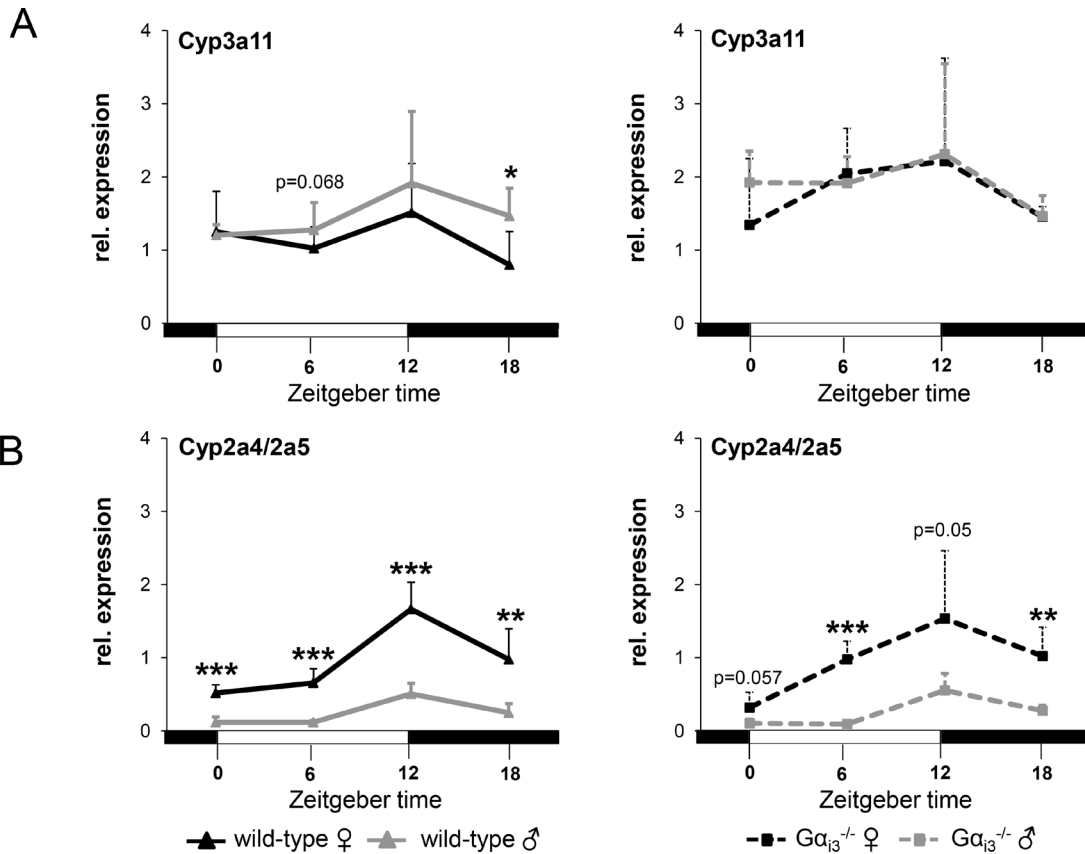

**Supplementary Figure 8: Rhythmic and sex-specific expression of Cyp3a11 and Cyp2a4/a5 genes in the liver of wild-type and  $G\alpha_{i3}^{-/-}$  mice.** Quantitative real-time PCR analysis of circadian expression of Cyp3a11 (A) and Cyp2a4/a5 (B) mRNAs in the liver of female vs. male wild-type animals (left panels) and female vs. male  $G\alpha_{i3}^{-/-}$  deficient animals (right panels). Mice were sacrificed and analyzed every six hours at the indicated time points (ZT 0 to ZT 18). Cyp3a11 and Cyp2a4/a5 transcript levels were normalized to the endogenous control Gapdh. Shown are  $2^{-\Delta C_t}$  values. Results are expressed as mean  $\pm$  s.d. of five animals analyzed per genotype and time point (\* $p < 0.05$ , \*\* $p < 0.01$ , \*\*\* $p < 0.001$  as compared to wild-type control animals).

**A**

Forskolin (10  $\mu$ M): - + + + + +  
666-15 ( $\mu$ M): 0 0 1 0.75 0.5 0.25

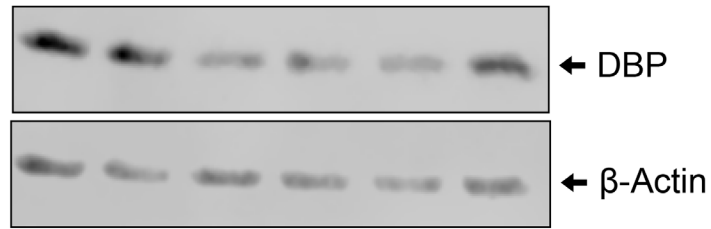**B**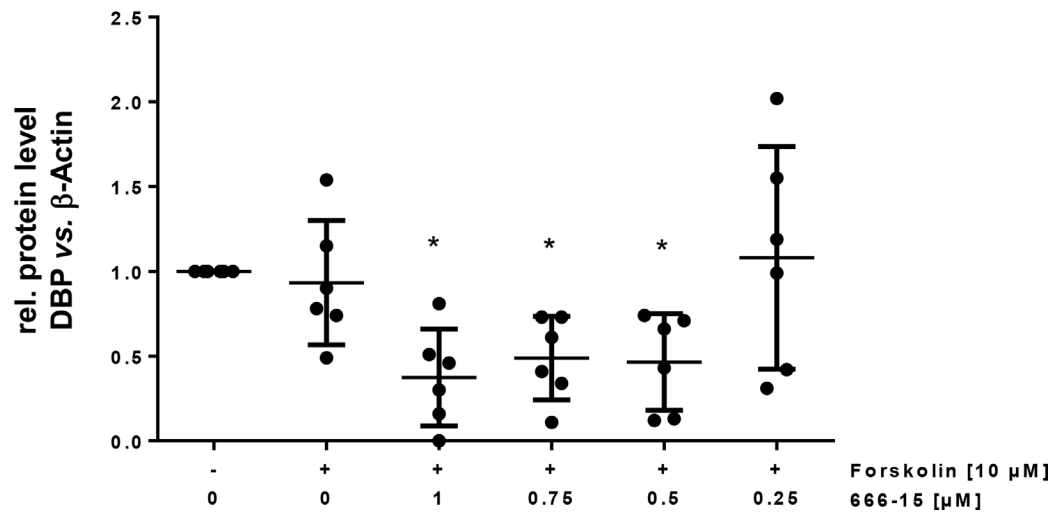

**Supplementary Figure 9: Decreased DBP protein levels upon inhibition of CREB in human HepG2 liver cells.** (A) Immunoblot analysis and (B) subsequent ImageJ based quantification of DBP protein levels in HepG2 cells upon 666-15 mediated inhibition of CREB. Cells were pre-treated with the selective CREB inhibitor 666-15 [4] (0.25–1.0  $\mu$ M) for 1h followed by treatment with 10  $\mu$ M Forskolin for 5 h. DBP protein levels were normalized to the endogenous control  $\beta$ -Actin. Results in (B) are expressed as mean  $\pm$  s.d. of six experiments (\* $p < 0.05$  as compared to untreated cells).

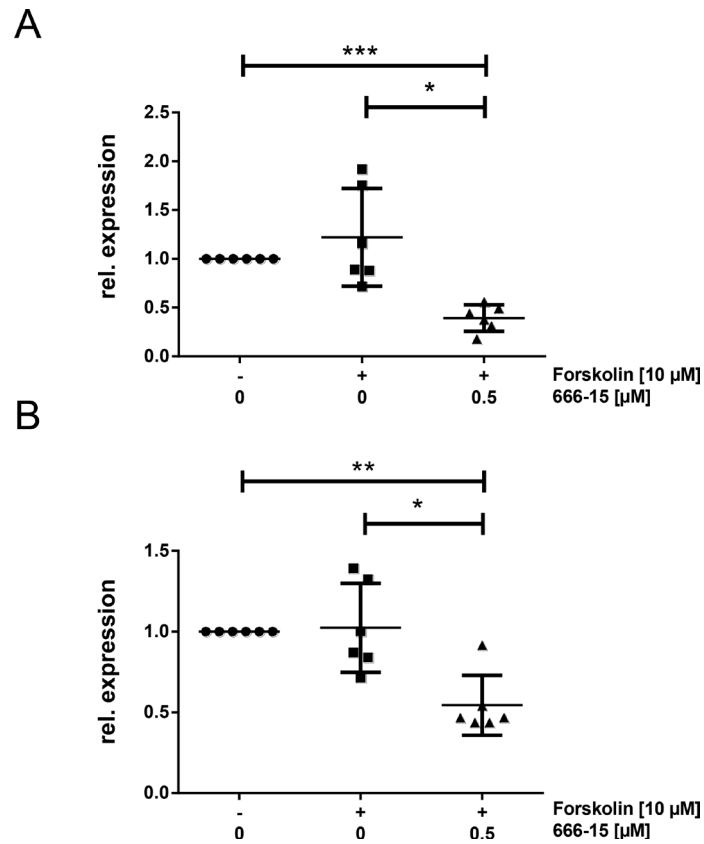

**Supplementary Figure 10: Decreased DBP and CYP3A4 mRNA levels upon inhibition of CREB in human HepG2 liver cells.** Quantitative real-time PCR analysis of DBP (A) and CYP3A4 mRNA levels (B) in HepG2 cells upon inhibition of CREB. Cells were pre-treated with the selective CREB inhibitor 666-15 [4] (0.5 μM) for 1h followed by treatment with 10 μM Forskolin for 5 h. Dbp and CYP3A4 transcript levels were normalized to the endogenous control β-Actin. Shown are  $2^{-\Delta C_t}$  values. Results are expressed as mean  $\pm$  s.d. of six experiments (\* $p < 0.05$ , \*\* $p < 0.01$ , \*\*\* $p < 0.001$  as compared to untreated cells).



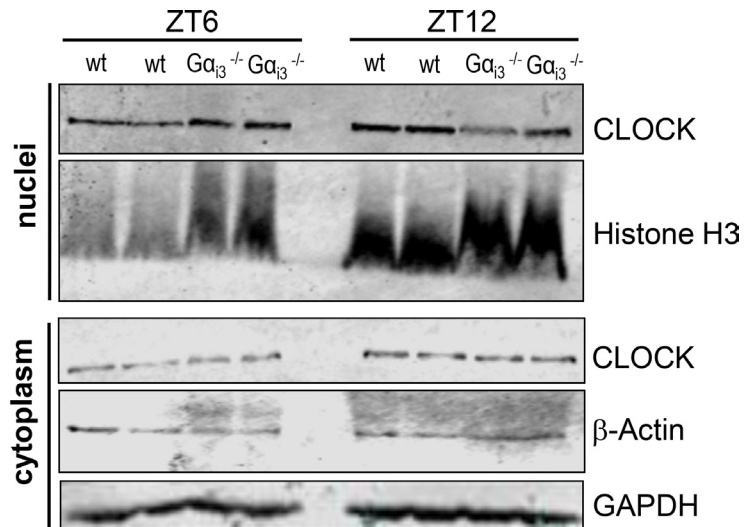

**Supplementary Figure 11: Levels of nuclear CLOCK are not affected in the liver of  $G\alpha_{i3}^{-/-}$  female mice.** Immunoblot analyses of nuclear proteins from the liver of female  $G\alpha_{i3}$  deficient mice vs. wild-type control animals. An antibody recognizing the core clock regulator CLOCK was employed. Total Histone and  $\beta$ -Actin/GAPDH levels were detected to normalize protein loading of nuclear and cytoplasmic fractions, respectively. Mice were analyzed at ZT 6 and ZT 12.
